# Supplementary material for: Participation in an Intensive Longitudinal Study with Weekly Web Surveys Over 2.5 Years
Source: PubMed Central journal article supplement (PMC4937177; doi:10.2196/jmir.5422), 2016-06-23
Supplement: jmir_v18i6e105_app2.pdf [file jmir_v18i6e105_app2.pdf]

**Multimedia Appendix 2. Descriptive Statistics for Individual Characteristics (N=953)**

---

|                                                                             | Mean/<br>Proportion | <i>SD</i> |
|-----------------------------------------------------------------------------|---------------------|-----------|
| <b>Sociodemographic Characteristics</b>                                     |                     |           |
| African American                                                            | .34                 |           |
| Education                                                                   |                     |           |
| Enrolled in high school                                                     | .14                 |           |
| Enrolled in 2-year college or vocational program                            | .29                 |           |
| Enrolled in 4-year college                                                  | .28                 |           |
| Completed high school/not enrolled                                          | .22                 |           |
| Dropped out of high school/not enrolled                                     | .08                 |           |
| Receiving public assistance                                                 | .26                 |           |
| Religious importance (1=not important, 4=more important than anything else) | 2.69                |           |
| Biological mother less than 20 years old at first birth                     | .37                 |           |
| Family Structure                                                            |                     |           |
| Two parents                                                                 | .52                 |           |
| One biological parent only                                                  | .40                 |           |
| Other                                                                       | .08                 |           |
| Mother's education less than high school graduate                           | .08                 |           |
| Parent's income                                                             |                     |           |
| <\$15,000                                                                   | .14                 |           |
| \$15,000 to \$44,999                                                        | .28                 |           |
| \$45,000 to \$74,999                                                        | .19                 |           |
| \$75,000 or greater                                                         | .19                 |           |
| Don't know/Refused                                                          | .20                 |           |
| Age                                                                         | 19.19               | .57       |
| <b>Personality</b>                                                          |                     |           |
| Extraversion                                                                | 2.69                | .53       |
| Agreeableness                                                               | 3.07                | .42       |
| Conscientiousness                                                           | 2.72                | .47       |
| Neuroticism                                                                 | 2.49                | .46       |
| Intellect/Imagination                                                       | 2.91                | .42       |
| <b>Contact Information/Mode</b>                                             |                     |           |
| Contact information: provided email and phone                               | .84                 |           |
| Reminder mode: text and email                                               | .33                 |           |
| Journal interview completed by phone (n=57,602)                             | .12                 |           |
| <b>Adolescent Experiences Related to Pregnancy</b>                          |                     |           |
| Age at first sex 16 years or less                                           | .52                 |           |
| Number of sexual partners 2 or more                                         | .60                 |           |
| Ever had sex without contraception                                          | .48                 |           |
| Number of prior pregnancies                                                 |                     |           |
| Zero                                                                        | .74                 |           |
| One                                                                         | .17                 |           |
| Two or more                                                                 | .09                 |           |
| <b>Summary of Changes During Study Period</b>                               |                     |           |
| Number of (new) sexual partners                                             | 1.83                | 1.91      |
| Any sex without contraception                                               | .54                 |           |
| Any pregnancy                                                               | .21                 |           |

---
