# Supplementary material for: Participation in an Intensive Longitudinal Study with Weekly Web Surveys Over 2.5 Years
Source: PubMed Central journal article supplement (PMC4937177; doi:10.2196/jmir.5422), 2016-06-23
Supplement: jmir_v18i6e105_app3.pdf [file jmir_v18i6e105_app3.pdf]

**Multimedia Appendix 3.** OLS Regression Models of Total Days in Study and Total Number of Journals Completed (n=953 respondents)

|                                                         | Total Days in Study |      |                   |      | Total Number of Completed Journals |       |                  |       |
|---------------------------------------------------------|---------------------|------|-------------------|------|------------------------------------|-------|------------------|-------|
|                                                         | 1                   | P    | 2                 | P    | 3                                  | P     | 4                | P     |
| <b>Sociodemographic characteristics</b>                 |                     |      |                   |      |                                    |       |                  |       |
| African American (ref: white)                           | -45.37<br>(24.88)   | .07  | -48.38<br>(23.34) | .04  | -10.92<br>(3.25)                   | <.001 | -11.35<br>(3.16) | <.001 |
| Education (ref: enrolled in 4-year college)             |                     |      |                   |      |                                    |       |                  |       |
| Enrolled in high school                                 | -67.63<br>(34.44)   | .049 | -80.53<br>(32.42) | .01  | -6.15<br>(4.49)                    | .17   | -6.99<br>(4.38)  | .11   |
| Enrolled in 2-year college or vocational program        | -14.26<br>(26.32)   | .59  | -22.12<br>(24.76) | .37  | -3.15<br>(3.43)                    | .36   | -3.88<br>(3.36)  | .25   |
| Completed high school/not enrolled                      | -51.39<br>(29.89)   | .09  | -71.01<br>(28.18) | .01  | -11.47<br>(3.90)                   | .003  | -12.29<br>(3.82) | .001  |
| Dropped out of high school/not enrolled                 | -39.46<br>(42.98)   | .36  | -34.64<br>(40.42) | .39  | -15.32<br>(5.61)                   | .006  | -14.90<br>(5.48) | .007  |
| Receiving public assistance                             | -4.92<br>(27.31)    | .86  | 2.43<br>(25.67)   | .92  | -1.00<br>(3.56)                    | .78   | 0.03<br>(3.48)   | .99   |
| Religious importance                                    | 23.30<br>(11.58)    | .04  | 26.22<br>(10.90)  | .02  | -.05<br>(1.51)                     | .97   | .54<br>(1.48)    | .72   |
| Biological mother less than 20 years old at first birth | -50.68<br>(21.51)   | .02  | -47.62<br>(20.20) | .02  | -7.13<br>(2.81)                    | .01   | -6.52<br>(2.74)  | .02   |
| Family Structure (ref: two parents)                     |                     |      |                   |      |                                    |       |                  |       |
| One biological parent only                              | -37.08<br>(22.57)   | .10  | -41.70<br>(21.17) | .049 | -4.21<br>(2.95)                    | .15   | -4.49<br>(2.87)  | .12   |
| Other                                                   | -58.49<br>(38.71)   | .13  | -57.93<br>(36.33) | .11  | -8.89<br>(5.05)                    | .08   | -8.47<br>(4.92)  | .09   |
| Mother's education less than high school                | -25.89<br>(35.78)   | .47  | -32.25<br>(33.58) | .34  | -7.23<br>(4.67)                    | .12   | -7.37<br>(4.55)  | .11   |
| Parent's income (ref: < \$15,000)                       |                     |      |                   |      |                                    |       |                  |       |
| \$15,000 to \$44,999                                    | 24.64<br>(32.53)    | .45  | -23.62<br>(30.54) | .44  | 3.50<br>(4.25)                     | .41   | 2.97<br>(4.14)   | .47   |
| \$45,000 to \$74,999                                    | 1.21<br>(36.53)     | .97  | -3.92<br>(34.33)  | .91  | -2.43<br>(4.77)                    | .61   | -3.63<br>(4.65)  | .44   |
| \$75,000 or greater                                     | -18.72<br>(39.03)   | .63  | -8.33<br>(36.69)  | .82  | 1.60<br>(5.09)                     | .75   | 1.73<br>(4.97)   | .73   |
| Don't know/Refused                                      | 37.55<br>(33.69)    | .27  | 31.99<br>(31.64)  | .31  | 6.62<br>(4.40)                     | .13   | 5.56<br>(4.29)   | .20   |
| Age                                                     | -26.73<br>(18.04)   | .14  | -14.09<br>(16.96) | .41  | -.96<br>(2.35)                     | .68   | .22<br>(2.30)    | .92   |
| <b>Personality</b>                                      |                     |      |                   |      |                                    |       |                  |       |
| Extraversion                                            | -9.50<br>(19.50)    | .63  | -26.28<br>(18.35) | .15  | -6.40<br>(2.54)                    | .01   | -7.88<br>(2.49)  | .002  |
| Agreeableness                                           | 15.18<br>(25.91)    | .56  | 2.14<br>(24.34)   | .93  | 3.12<br>(3.38)                     | .36   | 1.85<br>(3.30)   | .57   |
| Conscientiousness                                       | 9.09<br>(21.16)     | .67  | 13.48<br>(19.87)  | .049 | 5.82<br>(2.76)                     | .04   | 6.48<br>(2.69)   | .02   |
| Neuroticism                                             | -8.70<br>(22.64)    | .70  | -14.05<br>(21.37) | .51  | -1.31<br>(2.95)                    | .66   | -1.74<br>(2.88)  | .55   |
| Intellect/Imagination                                   | 7.74<br>(24.19)     | .75  | 19.04<br>(22.72)  | .40  | .11<br>(3.16)                      | .97   | .75<br>(3.08)    | .81   |

**Contact Information/Mode**

|                                                                                                           |                   |       |                  |       |                 |       |                 |       |
|-----------------------------------------------------------------------------------------------------------|-------------------|-------|------------------|-------|-----------------|-------|-----------------|-------|
| Contact information:<br>provided email and phone<br>(ref: provided only one or no<br>contact information) | 114.03<br>(28.69) | <.001 | 93.97<br>(26.97) | <.001 | 17.99<br>(3.74) | <.001 | 16.26<br>(3.66) | <.001 |
|-----------------------------------------------------------------------------------------------------------|-------------------|-------|------------------|-------|-----------------|-------|-----------------|-------|

|                                                                             |                   |     |                   |     |                |     |                 |     |
|-----------------------------------------------------------------------------|-------------------|-----|-------------------|-----|----------------|-----|-----------------|-----|
| Reminder mode: text and<br>email (ref: only one or no<br>mode for reminder) | -13.19<br>(20.89) | .53 | -23.98<br>(19.62) | .22 | -.88<br>(2.73) | .75 | -1.96<br>(2.66) | .46 |
|-----------------------------------------------------------------------------|-------------------|-----|-------------------|-----|----------------|-----|-----------------|-----|

**Adolescent Pregnancy-  
Related Experiences**

|                                      |                   |     |                   |     |                 |     |                 |     |
|--------------------------------------|-------------------|-----|-------------------|-----|-----------------|-----|-----------------|-----|
| Age at first sex 16 years or<br>less | -16.46<br>(25.94) | .53 | -30.95<br>(24.39) | .20 | -2.84<br>(3.38) | .40 | -3.85<br>(3.31) | .24 |
|--------------------------------------|-------------------|-----|-------------------|-----|-----------------|-----|-----------------|-----|

|                                        |                  |     |                   |     |                 |     |                 |      |
|----------------------------------------|------------------|-----|-------------------|-----|-----------------|-----|-----------------|------|
| Number of sexual partners 2<br>or more | -1.70<br>(26.67) | .95 | -46.43<br>(25.56) | .07 | -5.01<br>(3.48) | .15 | -9.65<br>(3.46) | .005 |
|----------------------------------------|------------------|-----|-------------------|-----|-----------------|-----|-----------------|------|

|                                       |                   |     |                   |      |                 |     |                 |      |
|---------------------------------------|-------------------|-----|-------------------|------|-----------------|-----|-----------------|------|
| Ever had sex without<br>contraception | -34.59<br>(24.22) | .15 | -64.41<br>(22.89) | .005 | -7.74<br>(3.16) | .01 | -9.92<br>(3.10) | .001 |
|---------------------------------------|-------------------|-----|-------------------|------|-----------------|-----|-----------------|------|

|                                      |  |  |  |  |  |  |  |  |
|--------------------------------------|--|--|--|--|--|--|--|--|
| Number of pregnancies (ref:<br>zero) |  |  |  |  |  |  |  |  |
|--------------------------------------|--|--|--|--|--|--|--|--|

|     |                  |     |                   |     |                 |     |                 |     |
|-----|------------------|-----|-------------------|-----|-----------------|-----|-----------------|-----|
| One | -1.28<br>(30.71) | .97 | -26.02<br>(28.97) | .37 | -2.91<br>(4.01) | .47 | -4.06<br>(3.93) | .30 |
|-----|------------------|-----|-------------------|-----|-----------------|-----|-----------------|-----|

|             |                   |     |                    |      |                  |      |                  |       |
|-------------|-------------------|-----|--------------------|------|------------------|------|------------------|-------|
| Two or more | -89.62<br>(38.53) | .02 | -111.11<br>(36.24) | .002 | -15.74<br>(5.03) | .002 | -16.75<br>(4.91) | <.001 |
|-------------|-------------------|-----|--------------------|------|------------------|------|------------------|-------|

**Summary of Changes****During Study Period**

|                                    |  |  |                 |       |  |  |               |       |
|------------------------------------|--|--|-----------------|-------|--|--|---------------|-------|
| Number of (new) sexual<br>partners |  |  | 26.71<br>(5.20) | <.001 |  |  | 3.82<br>(.70) | <.001 |
|------------------------------------|--|--|-----------------|-------|--|--|---------------|-------|

|                                  |  |  |                  |       |  |  |                |     |
|----------------------------------|--|--|------------------|-------|--|--|----------------|-----|
| Any sex without<br>contraception |  |  | 87.26<br>(21.06) | <.001 |  |  | 4.70<br>(2.85) | .10 |
|----------------------------------|--|--|------------------|-------|--|--|----------------|-----|

|               |  |  |                   |       |  |  |                |     |
|---------------|--|--|-------------------|-------|--|--|----------------|-----|
| Any pregnancy |  |  | 140.79<br>(24.30) | <.001 |  |  | 6.64<br>(3.29) | .04 |
|---------------|--|--|-------------------|-------|--|--|----------------|-----|

|                           |     |  |     |  |     |  |     |  |
|---------------------------|-----|--|-----|--|-----|--|-----|--|
| R <sup>2</sup> (adjusted) | .08 |  | .19 |  | .20 |  | .24 |  |
|---------------------------|-----|--|-----|--|-----|--|-----|--|

---
