# Supplementary material for: Participation in an Intensive Longitudinal Study with Weekly Web Surveys Over 2.5 Years
Source: PubMed Central journal article supplement (PMC4937177; doi:10.2196/jmir.5422), 2016-06-23
Supplement: jmir_v18i6e105_app4.pdf [file jmir_v18i6e105_app4.pdf]

**Multimedia Appendix 4.** Logistic Regression Models of Late Journal Completion (coefficients are odds ratios, confidence intervals in parentheses) (n=953 respondents, n=57,602 journal interviews)

|                                                                             | <b>Late Journal Completion</b> |          |                       |          |
|-----------------------------------------------------------------------------|--------------------------------|----------|-----------------------|----------|
|                                                                             | 1                              | <i>P</i> | 2                     | <i>P</i> |
| <b>Sociodemographic Characteristics</b>                                     |                                |          |                       |          |
| African American                                                            | 1.34<br>(1.10 – 1.62)          | .004     | 1.31<br>(1.08 – 1.59) | .007     |
| Education (ref: enrolled in 4-year college)                                 |                                |          |                       |          |
| Enrolled in high school                                                     | 1.02<br>(.77 – 1.36)           | .89      | 1.00<br>(.75 – 1.33)  | .98      |
| Enrolled in 2-year college or vocational program                            | 1.07<br>(.86 – 1.34)           | .55      | 1.06<br>(.85 – 1.33)  | .59      |
| Completed high school/not enrolled                                          | 1.30<br>(1.01 – 1.67)          | .04      | 1.30<br>(1.01 – 1.66) | .04      |
| Dropped out of high school/not enrolled                                     | 1.49<br>(1.03 – 2.15)          | .03      | 1.51<br>(1.06 – 2.16) | .02      |
| Receiving public assistance                                                 | 1.01<br>(.81 – 1.25)           | .95      | 1.02<br>(.83 – 1.26)  | .85      |
| Biological mother less than 20 years old at first birth                     | 1.13<br>(.94 – 1.35)           | .20      | 1.12<br>(.93 – 1.34)  | .23      |
| Family Structure (ref: two parents)                                         |                                |          |                       |          |
| One biological parent only                                                  | 1.10<br>(.91 – 1.32)           | .33      | 1.09<br>(.90 – 1.31)  | .38      |
| Other                                                                       | 1.07<br>(.74 – 1.55)           | .71      | 1.06<br>(.75 – 1.51)  | .73      |
| Mother's education less than high school                                    | 1.19<br>(.89 – 1.58)           | .23      | 1.17<br>(.89 – 1.54)  | .27      |
| Parent's income (ref: < \$15,000)                                           |                                |          |                       |          |
| \$15,000 to \$44,999                                                        | .95<br>(.73 – 1.23)            | .70      | .97<br>(.75 – 1.26)   | .81      |
| \$45,000 to \$74,999                                                        | 1.12<br>(.83 – 1.51)           | .45      | 1.13<br>(.84 – 1.52)  | .42      |
| \$75,000 or greater                                                         | .92<br>(.67 – 1.28)            | .64      | .95<br>(.69 – 1.31)   | .75      |
| Don't know/Refused                                                          | .87<br>(.66 – 1.14)            | .30      | .87<br>(.66 – 1.13)   | .30      |
| Religious Importance                                                        | 1.07<br>(.98 – 1.17)           | .16      | 1.07<br>(.98 – 1.17)  | .13      |
| Age                                                                         | 1.01<br>(.87 – 1.18)           | .89      | 1.03<br>(.89 – 1.20)  | .71      |
| <b>Personality</b>                                                          |                                |          |                       |          |
| Extraversion                                                                | 1.14<br>(.97 – 1.35)           | .12      | 1.11<br>(.94 – 1.31)  | .21      |
| Agreeableness                                                               | .95<br>(.78 – 1.15)            | .58      | .94<br>(.77 – 1.15)   | .54      |
| Conscientiousness                                                           | .78<br>(.65 - .93)             | .005     | .79<br>(.66 - .94)    | .007     |
| Neuroticism                                                                 | 1.01<br>(.83 – 1.23)           | .96      | 1.00<br>(.83 – 1.22)  | .98      |
| Intellect/Imagination                                                       | 1.05<br>(.86 – 1.27)           | .64      | 1.06<br>(.87 – 1.28)  | .59      |
| <b>Contact Information/Mode</b>                                             |                                |          |                       |          |
| Contact information: provided email and phone (ref: provided only one or no | .73<br>(.56 – .95)             | .02      | .73<br>(.57 – .94)    | .01      |

|                                                                       |                       |     |                       |       |
|-----------------------------------------------------------------------|-----------------------|-----|-----------------------|-------|
| contact information)                                                  |                       |     |                       |       |
| Reminder mode: text and email (ref: only one or no mode for reminder) | 1.02<br>(.86 – 1.22)  | .81 | 1.01<br>(.85 – 1.20)  | .91   |
| <b>Adolescent Pregnancy-Related Experiences</b>                       |                       |     |                       |       |
| Age at first sex 16 years or less                                     | 1.09<br>(.88 – 1.34)  | .45 | 1.08<br>(.88 – 1.34)  | .45   |
| Number of sexual partners 2 or more                                   | 1.13<br>(.90 – 1.40)  | .29 | 1.07<br>(.86 – 1.33)  | .55   |
| Ever had sex without contraception                                    | 1.23<br>(1.01 – 1.48) | .04 | 1.18<br>(.98 – 1.42)  | .09   |
| Number of pregnancies (ref: zero)                                     |                       |     |                       |       |
| One                                                                   | 1.15<br>(.91 – 1.47)  | .25 | 1.10<br>(.87 – 1.40)  | .42   |
| Two or more                                                           | 1.34<br>(.95 – 1.88)  | .10 | 1.24<br>(.89 – 1.74)  | .21   |
| <b>Pregnancy-Related Changes since prior Journal</b>                  |                       |     |                       |       |
| Sex (ref: no change)                                                  |                       |     |                       |       |
| Stopped having sex                                                    |                       |     | 1.21<br>(1.08 – 1.35) | .001  |
| Started having sex                                                    |                       |     | 1.17<br>(1.03 – 1.32) | .01   |
| Partner transitions (ref: no change)                                  |                       |     |                       |       |
| Break-up<br>(partner at time 1; no partner at time 2)                 |                       |     | 1.39<br>(1.21 – 1.61) | <.001 |
| New partner<br>(no partner at time 1; partner at time 2)              |                       |     | 1.76<br>(1.53 – 2.03) | <.001 |
| Partner switch<br>(partner at time 1; different partner at time 2)    |                       |     | 3.09<br>(2.56 – 3.74) | <.001 |
| Contraceptive Use (ref: no change)                                    |                       |     |                       |       |
| Stopped using contraception                                           |                       |     | 1.28<br>(1.10 – 1.49) | .001  |
| Started using contraception                                           |                       |     | 1.14<br>(.98 – 1.32)  | .09   |
| Pregnancy (ref: no change)                                            |                       |     |                       |       |
| Pregnancy ended                                                       |                       |     | 6.97<br>(5.39 – 9.01) | <.001 |
| New pregnancy                                                         |                       |     | 5.57<br>(4.26 – 7.29) | <.001 |
| Chi-square                                                            | 1224.36               |     | 2396.64               |       |
| Degrees of freedom                                                    | 28                    |     | 37                    |       |
